# Supplementary material for: Ultrafast single-droplet bouncing actuator with electrostatic force on superhydrophobic electrodes
Source: Royal Society of Chemistry journal article supplement (doi:10.1039/c6ra12092j), 2016-01-01
Supplement: c6ra12092j1.pdf [file c6ra12092j1.pdf]

Supporting Information for Publication

## **Ultrafast Single-Droplet Bouncing Actuator with Electrostatic Force on Superhydrophobic Electrodes**

Seulah Lee,<sup>‡a</sup> Sanggeun Lee,<sup>‡a</sup> Hyunseok Hwang,<sup>b</sup> Juree Hong,<sup>a</sup> Soonil Lee,<sup>a</sup> Jaehong Lee,<sup>a</sup>

Youngcheol Chae<sup>\*\*b</sup> and Taeyoon Lee<sup>\*a</sup>

<sup>a</sup>Nanobio Device Laboratory, School of Electrical and Electronic Engineering, Yonsei University, 50 Yonsei-Ro, Seodaemun-Gu, Seoul 120-749, Republic of Korea

<sup>b</sup>Mixed-Signal IC Laboratory, School of Electrical and Electronic Engineering, Yonsei University, 50 Yonsei-Ro, Seodaemun-Gu, Seoul 120-749, Republic of Korea

\* Corresponding author:

Tel: +82 2 2123 5767

Fax: +82 2 313 2879

E-mail address: taeyoon.lee@yonsei.ac.kr

\*\* Corresponding author:

Tel: +82 2 2123 2866

Fax: +82 2 313 2879

E-mail address: ychae@yonsei.ac.kr

§ These authors equally contributed to this work

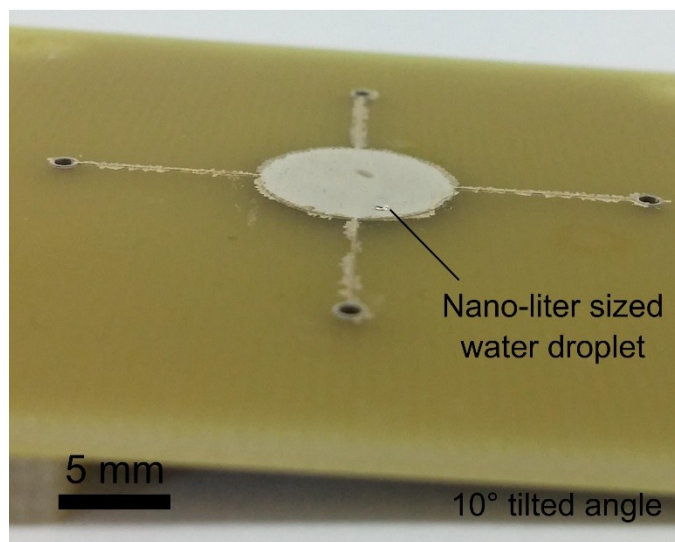

Figure S1. Photograph of the nano-liter sized water droplet on the superhydrophobic electrode with a tilted angle of  $10^\circ$ .

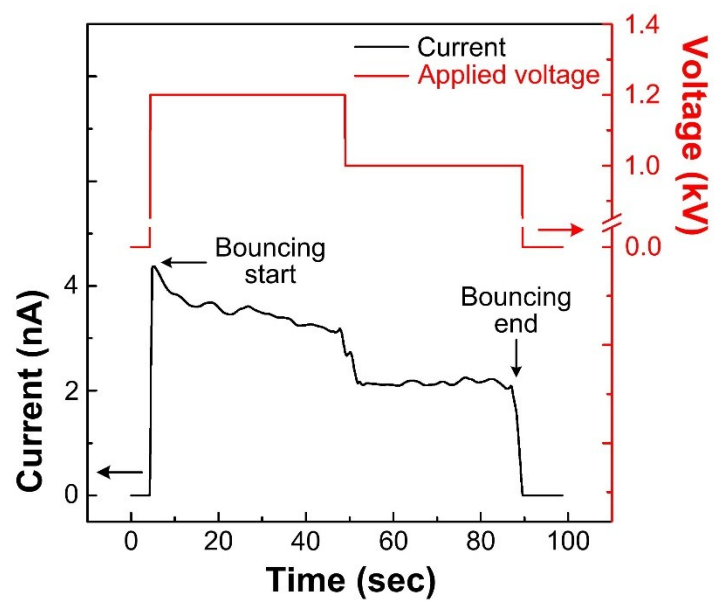

Figure S2. The electrical current signal of a  $\sim 1\mu\text{L}$  droplet of PEDOT:PSS solution during bouncing motion varying the applied voltage at 1.2 kV and 1 kV obtained from the electrometer.

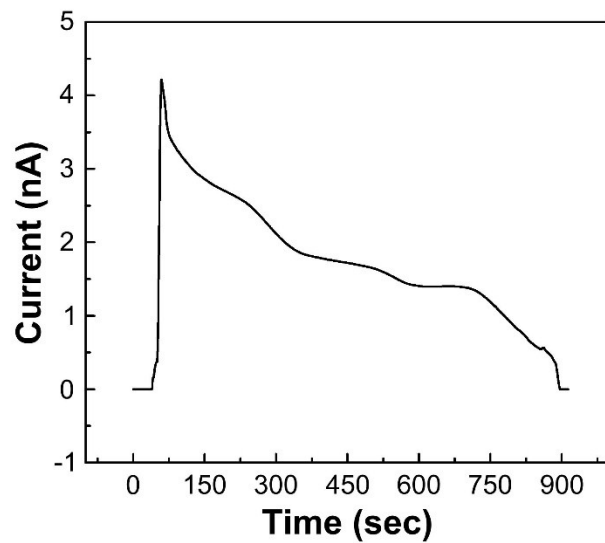

Figure S3. The current of a  $\sim 1\mu\text{L}$  water droplet during bouncing motion was measured at the constant applied voltage of 1 kV until the droplet was completely evaporated.
